# Supplementary material for: Stakeholder perspectives on integration of mental health services into primary care: a mixed methods study in Northern Iraq
Source: PubMed Central journal article supplement (PMC6935235; doi:10.1186/s13033-019-0330-7), 2019-12-28
Supplement: 13033_2019_330_MOESM1_ESM.pdf [file 13033_2019_330_MOESM1_ESM.pdf]

To be completed by the interviewer or project director:

دەبیت لەلایەن دیمانه‌ساز یا بەرپۆشەبەرى پرۆژەوێ پرېکرتەوێ:

|                  |                            |                            |                 |
|------------------|----------------------------|----------------------------|-----------------|
| Respondent ID #: |                            |                            | کۆدى وەلامدەر   |
| Today's date     |                            |                            | بەروارى ئەمڕۆ   |
| Time-point       | 1<br>Baseline<br>یەكەم جار | 2<br>follow-up<br>دووم جار | کات             |
| Interviewer ID # |                            |                            | کۆدى دیمانه‌ساز |

Instructions to interviewer:رێنمایی بۆ دیمانه‌ساز

Circle the answer for each question. If person refuses to answer a question, cross out whole row for that question with one line.

بازنەپەك بکێشه بەدەورى وەلامەکاندا. ئەگەر کەسەكە پزى نەبوو وەلامى پرسىاریك بداتەوێ یان وەلامى پرسىارى نەدەزانى ئەوا هێلێك بەسەر ئەو پرسىارەدا بەنێنە.

1. Demographic Characteristics1-پێناسەى وەلامدەر

|      |                                                            |                  |                          |                                          |                                                                             |                                                         |                                                |     |
|------|------------------------------------------------------------|------------------|--------------------------|------------------------------------------|-----------------------------------------------------------------------------|---------------------------------------------------------|------------------------------------------------|-----|
| 1.1. | Record gender of respondent.                               | 0<br>Male<br>نێر |                          | 1<br>Female<br>مى                        |                                                                             | رەگەزى وەلامدەر؟                                        | 1،1                                            |     |
| 1.2. | What is the year of your birth?                            |                  |                          |                                          |                                                                             |                                                         | موالیدت چەندە؟                                 | 1،2 |
| 1.3. | What is the highest level of education you have completed? | 0<br>None<br>هیچ | 1<br>Primary<br>سەرەتایى | 2<br>Secondary<br>ناوەندى یان<br>نامادەى | 3<br>Institutional<br>degree/<br>Certificate<br>بروانامە و<br>پلەى پەیمانگا | 5<br>Bachelor's<br>or higher<br>بەكالۆریۆس<br>یا بەرزتر | بەرزترین ئاستى خویندنت<br>چیه كە تەواوت كردوێ؟ | 1،3 |

**2. Adoption**

**2-په پرمو كردن**

| Question<br>پرسيار                                                                                                            | Not at all<br>به هيچ<br>شيويهيك | A little bit<br>كهميك | A moderate amount<br>تا رادهيك-مام<br>ناوند | A lot<br>زور | Do not know<br>نازانم | Question<br>پرسيار                                                                                                                              |     |
|-------------------------------------------------------------------------------------------------------------------------------|---------------------------------|-----------------------|---------------------------------------------|--------------|-----------------------|-------------------------------------------------------------------------------------------------------------------------------------------------|-----|
| 2.1. How much do you support implementing step-by-step psychotherapy services in the clinic where you work? (24)              | 0                               | 1                     | 2                                           | 3            | 9                     | تا چهنديك پالپشتي<br>جيبه-چيكردي خزمه-تگوزاري<br>چارهسهرى دهروني ههنگاو<br>بهههنگاو دهكهيته لهو بنكه<br>تهندروسستيبهيك كاري<br>تيادهكهيته؟ (24) | 2،1 |
| 2.2 How much assistance could you provide, if needed, to integrate step-by-step psychotherapy into clinic services? (15)      | 0                               | 1                     | 2                                           | 3            | 9                     | تا چهنديك دهتوانيته<br>يارمه-تيدهربيت لهزيادكردي<br>چارهسهرى دهروني ههنگاو<br>بهههنگاو بو<br>خزمه-تگوزاري بهكاني بنكه<br>تهندروسستيبهيكه؟ (15)  | 2،2 |
| 2.3. To what extent would you refer patients with mental health problems to receive step-by-step psychotherapy services? (16) | 0                               | 1                     | 2                                           | 3            | 9                     | تا چ رادهيك نهو نهخوشانهيك<br>گرفتي تهندروسستيه دهرونيان<br>ههيه رهوانهيك خزمه-تگوزاري<br>چارهسهرى ههنگاو به ههنگاو<br>دهكهيته؟ (16)            | 2،3 |

3. Acceptability

3- ھېۋئىگىردىن (بەسەندىگىردىن)

| Question<br>پىرسىيار                                                                                                 | Not at all<br>بە ھىچ<br>شىۋىمىيەك | A little bit<br>كەمىك | A moderate amount<br>تا رادەيەك- مام<br>ناۋەند | A lot<br>زۇر | Do not know<br>نازانم | Question<br>پىرسىيار                                                                                                   |     |
|----------------------------------------------------------------------------------------------------------------------|-----------------------------------|-----------------------|------------------------------------------------|--------------|-----------------------|------------------------------------------------------------------------------------------------------------------------|-----|
| 3.1. To what extent is step-by-step psychotherapy a priority for the government?(19)                                 | 0                                 | 1                     | 2                                              | 3            | 9                     | تا چ رادەيەك چارەسەرى دەرونى ھەنگاۋ بەھەنگاۋ لاي ھىكۈمەت ئەۋلەۋىيەتى ھەيە؟ (19)                                        | 3,1 |
| 3.2. How much does your job negatively affect your family life? (40)                                                 | 0                                 | 1                     | 2                                              | 3            | 9                     | تا چەندىك ئىشەكەي تۇ كارىگەرى خرابى لەسەر ژيانى خىزانىت ھەيە؟ (40)                                                     | 3,2 |
| 3.3. How appropriate is step-by-step psychotherapy for your culture? (26)                                            | 0                                 | 1                     | 2                                              | 3            | 9                     | تا چەندىك چارەسەرى دەرونى ھەنگاۋ بەھەنگاۋ گونجاۋە بۇ كەلتورى تۇ؟ (26)                                                  | 3,3 |
| 3.4. To what extent is step-by-step psychotherapy a priority for the administration/leadership of the clinic? (27)   | 0                                 | 1                     | 2                                              | 3            | 9                     | تا چ رادەيەك چارەسەرى دەرونى ھەنگاۋ بەھەنگاۋ ئەۋلەۋىيەتى ھەيە لە لاي بەرپۈۋەبەرايەتى بىنكە تەندىرۋستىيەكە؟ (27)        | 3,4 |
| 3.5. How acceptable do you believe step-by-step psychotherapy is to your health center? (28)                         | 0                                 | 1                     | 2                                              | 3            | 9                     | تا چەندىك پىت وايە چارەسەرى دەرونى ھەنگاۋ بەھەنگاۋ مەقبولە لە لايەن بىنكە تەندىرۋستىيەكەت؟ (28)                        | 3,5 |
| 3.6. How acceptable do you believe step-by-step psychotherapy is to this community? (29)                             | 0                                 | 1                     | 2                                              | 3            | 9                     | تا چەندىك پىت وايە چارەسەرى دەرونى ھەنگاۋ بەھەنگاۋ لەم كۆمەلگاكەيەدا مەقبولە؟ (29)                                     | 3,6 |
| 3.7. To what extent does the step-by-step psychotherapy program fit with how this clinic functions/does things? (25) | 0                                 | 1                     | 2                                              | 3            | 9                     | تا چ رادەيەك پىرۇگرامى چارەسەرى دەرونى ھەنگاۋ بەھەنگاۋ لەگەل چۆنىيەتى كارگردنى ئەم بىنكە تەندىرۋستىيەدا دەگونجىت؟ (25) | 3,7 |

4. Appropriateness

4- گونجاوى

| Question<br>پرسىيار                                                                                                                                                   | Not at all<br>به هيچ شيوه يهك | A little bit<br>كه ميك | A moderate amount<br>تا راده يهك- مام ناوهند | A lot<br>زور | Do not know<br>نازانم | Question<br>پرسىيار                                                                                                                                                           |     |
|-----------------------------------------------------------------------------------------------------------------------------------------------------------------------|-------------------------------|------------------------|----------------------------------------------|--------------|-----------------------|-------------------------------------------------------------------------------------------------------------------------------------------------------------------------------|-----|
| 4.1. Given the other health problems people have, how important is it for the government to allocate resources (e.g. time, salary) to step-by-step psychotherapy? (1) | 0                             | 1                      | 2                                            | 3            | 9                     | بهره چاوكردنى پيداويستيه پيداويستيه كانى ترى خه لك، تا چهنديك گرنگه سهر چاوه كانى وهكو پاره و كات بۇ چاره سهرى دهرورنى ههنگاو به ههنگاو له لايهن حكومه ته وه داببن بكرىت؟ (1) | 4،1 |
| 4.2. To what extent does the step-by-step psychotherapy program fit with this clinic's priorities and goals? (3)                                                      | 0                             | 1                      | 2                                            | 3            | 9                     | تا چ راده يهك پروگرامى چاره سهرى دهرورنى ههنگاو به ههنگاو له گهل نامانچ و نه وله ويه ته كانى نه م بنكه تهندروستيه دهگونجىت؟ (3)                                               | 4،2 |
| 4.3. How appropriate is step-by-step psychotherapy for clients' mental health problems? (4)                                                                           | 0                             | 1                      | 2                                            | 3            | 9                     | تا چهنديك چاره سهرى دهرورنى ههنگاو به ههنگاو بۇ گرفتى تهندروستى دهرورنى نه خوشه كان دهگونجىت؟ (4)                                                                             | 4،3 |
| 4.4. How helpful do you believe step-by-step psychotherapy is for this clinic? (5)                                                                                    | 0                             | 1                      | 2                                            | 3            | 9                     | تا چهنديك پىت وايه چاره سهرى دهرورنى ههنگاو به ههنگاو بۇ نه م بنكه تهندروستييه به سوده؟ (5)                                                                                   | 4،4 |
| 4.5. How helpful do you believe step-by-step psychotherapy is for this country? (6)                                                                                   | 0                             | 1                      | 2                                            | 3            | 9                     | تا چهنديك پىت وايه چاره سهرى دهرورنى ههنگاو به ههنگاو بۇ نه م ولاته به سوده؟ (6)                                                                                              | 4،5 |
| 4.6. How helpful do you believe step-by-step psychotherapy is for people in this community? (7)                                                                       | 0                             | 1                      | 2                                            | 3            | 9                     | تا چهنديك پىت وايه چاره سهرى دهرورنى ههنگاو به ههنگاو بۇ خه لگى نه م كؤمه لگايه به سوده؟ (7)                                                                                  | 4،6 |

|      |                                                                                                             |   |   |   |   |   |                                                                                                                               |     |
|------|-------------------------------------------------------------------------------------------------------------|---|---|---|---|---|-------------------------------------------------------------------------------------------------------------------------------|-----|
| 4.7. | To what extent does providing step-by-step psychotherapy negatively affect provision of other services? (8) | 0 | 1 | 2 | 3 | 9 | تا چ رادەيەك پېشكەشكەشكردنى چارەسەرى دەرونى ھەنگاۋ بەھەنگاۋ كارىگەرى خراب دەكاتە سەر پېشكەشكەشكردنى خزمەتگوزارىيەكانى تر؟ (8) | 4,7 |
|------|-------------------------------------------------------------------------------------------------------------|---|---|---|---|---|-------------------------------------------------------------------------------------------------------------------------------|-----|

## 5. Autonomy

## 5- سەربەخۆيى

| Question<br>پرسىيار |                                                                                                                   | Not at all<br>بە ھىچ شىۋەيەك | A little bit<br>كەمىك | A moderate amount<br>تا رادەيەك-مام ناۋەند | A lot<br>زۆر | Do not know<br>نازانم | Question<br>پرسىيار                                                                                             |     |
|---------------------|-------------------------------------------------------------------------------------------------------------------|------------------------------|-----------------------|--------------------------------------------|--------------|-----------------------|-----------------------------------------------------------------------------------------------------------------|-----|
| 5.1.                | How much does the clinic where you work trust your professional judgment? (22)                                    | 0                            | 1                     | 2                                          | 3            | 9                     | تا چەندىك ئەو بىنكە تەندروستىيەى ئىشى تېدا دەكەيت، متمانەيان بە بېرىارەكانت ھەيە؟ (22)                          | 5,1 |
| 5.2.                | To what extent do you feel that you have an appropriate level of autonomy to make decisions in your work? (23)    | 0                            | 1                     | 2                                          | 3            | 9                     | تا چ رادەيەك ھەست دەكەيت كە ئاستىكى گونجاۋى سەربەخۆيىت ھەيە بۇ ئەۋەى بېرىار بەدەيت لەكارەكەتدا؟ (23)            | 5,2 |
| 5.3.                | How comfortable do you feel making suggestions to your boss/supervisor? (46)                                      | 0                            | 1                     | 2                                          | 3            | 9                     | تا چەندىك ھەست دەكەيت دەتوانىت بە ئىسراحت پېشنىياربەكەيت بۇ بەرپۆۋەبەرىتى بىنكە تەندروستىيەكە؟ (46)             | 5,3 |
| 5.4.                | To what extent do you feel like you could make suggestions at work that might go against others' viewpoints? (47) | 0                            | 1                     | 2                                          | 3            | 9                     | تا چ رادەيەك ھەست دەكەيت دەتوانىت لەكارەكەتدا ئەو پېشنىيارانە بىخەيتە رۈۋ كە لەگەل بۇچونى كەسانى تردا نىن؟ (47) | 5,4 |

|     |                                                                                                                                                          |                               |                                                                                  |                                                        |                                        |                                                      |                                                                                                                                                                                          |     |
|-----|----------------------------------------------------------------------------------------------------------------------------------------------------------|-------------------------------|----------------------------------------------------------------------------------|--------------------------------------------------------|----------------------------------------|------------------------------------------------------|------------------------------------------------------------------------------------------------------------------------------------------------------------------------------------------|-----|
| 5.5 | Who has a role in making decisions at the clinic such as what the clinic is planning to do and how it will be carried out)? (circle all that apply) (50) | 1<br>Provid<br>ers<br>چارهساز | 2<br>Other<br>clinical<br>staff<br>کارمەند<br>ی تری<br>بنکه<br>تەندروس<br>تییهکه | 3<br>Administr<br>ative staff<br>کارمەندانی<br>کارگیری | 4<br>Directors<br>به‌ڕێوه‌به‌ر<br>هکان | 5<br>Others<br>(specify)<br>کهسانی تر<br>(دیاری بکه) | له شوینی کارهکهت کی دهوری<br>ههیه له بریارداندا (بۆ نمونه<br>بنکه تەندروستییهکه پلانی<br>ههیه چی بکات، ههروهها چۆن<br>ئەنجامی دەدات (بازنه بکیشه<br>به‌دهوری وه‌لامه راستهکاندا)<br>(50) | 5,5 |
|-----|----------------------------------------------------------------------------------------------------------------------------------------------------------|-------------------------------|----------------------------------------------------------------------------------|--------------------------------------------------------|----------------------------------------|------------------------------------------------------|------------------------------------------------------------------------------------------------------------------------------------------------------------------------------------------|-----|

### 6. Step-by-step Psychotherapy Knowledge

### 6-زانیینی چارهسەری دەرونی ههنگاو بهههنگاو

| Question<br>پرسیار |                                                                                                                                       | Responses<br>وه‌لامه‌کان |                   |                            | Question<br>پرسیار                                                                                                                          |       |
|--------------------|---------------------------------------------------------------------------------------------------------------------------------------|--------------------------|-------------------|----------------------------|---------------------------------------------------------------------------------------------------------------------------------------------|-------|
| 6.1.               | Yes or no: Step-by-step psychotherapies are long term treatments that lasts a minimum of a year (51)                                  | 0<br>No<br>نه‌خیر        | 1<br>Yes<br>به‌ئێ | 9<br>Do not Know<br>نازانم | چارهسەری دەرونی ههنگاو<br>بهههنگاو درێژخایه‌نه‌و لانی<br>که‌م سائیک ده‌خایه‌نییت (51)                                                       | 6,1   |
| 6.2.               | Yes or no: Step-by-step psychotherapy is a treatment that is shown to be effective in Kurdistan for adult mental health problems (52) | 0<br>No<br>نه‌خیر        | 1<br>Yes<br>به‌ئێ | 9<br>Do not Know<br>نازانم | به‌ئێ، نه‌خیر: له کوردستاندا،<br>چارهسەری دەرونی ههنگاو<br>بهههنگاو بۆ گرتنه‌کانی<br>تەندروستی دەرونی کهسانی<br>پینگه‌یشتوو، کاریگه‌ره (52) | 6,2,6 |
| 6.3.               | Yes or no: Step-by-step psychotherapies focuses on thoughts, feelings and behaviors (54)                                              | 0<br>No<br>نه‌خیر        | 1<br>Yes<br>به‌ئێ | 9<br>Do not Know<br>نازانم | چارهسەری دەرونی ههنگاو<br>بهههنگاو ته‌رکیزده‌کاته سه‌ر<br>هزر (فکر) و هه‌ست و ره‌فتار<br>(54)                                               | 6,6,3 |
| 6.4.               | Yes or no: Step-by-step psychotherapy is a talk-based counseling program.                                                             | 0<br>No<br>نه‌خیر        | 1<br>Yes<br>به‌ئێ | 9<br>Do not Know<br>نازانم | چارهسەری دەرونی ههنگاو<br>بهههنگاو به‌نده له‌سه‌ر<br>پاویژکاری گه‌فتوگۆ.                                                                    | 6,4   |

7. Feasibility

7- ەمەلىيەت

| Question<br>پرسیار                                                                                          | Not at all<br>بە هیچ<br>شۈبھەك | A little bit<br>كەمەك | A moderate amount<br>تا رادەيەك- مام<br>ناوند | A lot<br>زۇر | Do not know<br>نازانم | Question<br>پرسیار                                                                                                       |     |
|-------------------------------------------------------------------------------------------------------------|--------------------------------|-----------------------|-----------------------------------------------|--------------|-----------------------|--------------------------------------------------------------------------------------------------------------------------|-----|
| 7.1. To what extent does the clinic have enough counselors to implement step-by-step psychotherapy? (32)    | 0                              | 1                     | 2                                             | 3            | 9                     | تا چ رادەيەك بىنكە<br>تەندروسىيەكە چارسازى<br>پېويستى ھەيە بۇ<br>جېبەجېكردى چارسەرى<br>دەرونى ھەنگاۋ بەھەنگاۋ؟<br>(32)   | 7,1 |
| 7.2. To what extent does the clinic have enough counselor time to implement step-by-step psychotherapy?     | 0                              | 1                     | 2                                             | 3            | 9                     | تا چ رادەيەك چارسازەكانى<br>بىنكە تەندروسىيەكە كاتى<br>تەواۋيان ھەيە بۇ<br>جېبەجېكردى چارسەرى<br>دەرونى ھەنگاۋ بەھەنگاۋ؟ | 7,2 |
| 7.3. To what extent does the clinic have sufficient budget to implement step-by-step psychotherapy? (61)    | 0                              | 1                     | 2                                             | 3            | 9                     | تا چ رادەيەك بىنكە<br>تەندروسىيەكە بودجەى<br>تەواۋى ھەيە بۇ<br>جېبەجېكردى چارسەرى<br>دەرونى ھەنگاۋ بەھەنگاۋ؟<br>(61)     | 7,3 |
| 7.4. To what extent does the clinic have enough private space to implement step-by-step psychotherapy? (62) | 0                              | 1                     | 2                                             | 3            | 9                     | تا چ رادەيەك بىنكە<br>تەندروسىيەكە شوئىنى تايبەتى<br>ھەيە بۇ جېبەجېكردى<br>چارسەرى دەرونى ھەنگاۋ<br>بەھەنگاۋ؟ (62)       | 7,4 |

| Question<br>پرسیار |                                                                                                                                                                                                                                              | Not at all<br>به هیچ<br>شیوہیہك | A little bit<br>كەمئىك | A moderate amount<br>تا رادەيەك-مام<br>ناوئند | A lot<br>زۆر | Do not know<br>نازانم | Question<br>پرسیار                                                                                                                                                                                                                               |     |
|--------------------|----------------------------------------------------------------------------------------------------------------------------------------------------------------------------------------------------------------------------------------------|---------------------------------|------------------------|-----------------------------------------------|--------------|-----------------------|--------------------------------------------------------------------------------------------------------------------------------------------------------------------------------------------------------------------------------------------------|-----|
| 7.5.               | To what extent does the clinic have enough other necessary resources to implement step-by-step psychotherapy? (Some examples could be support staff, administrative time, transportation money, or any other resources you might need.) (33) | 0                               | 1                      | 2                                             | 3            | 9                     | تا چ رادەيەك بئىكە<br>تەندروستىيەكە سەرچاوەى<br>تەواوۋى تىرى بەدەستەوہيە بۇ<br>جىبەجىكردنى چارەسەرى<br>دەرونى ھەنگاۋ بەھەنگاۋ (بۇ<br>نمۇنە، كارمەندى كارگىرى،<br>كات، ھۆيەكانى گواستەوہ،<br>پارە، يان ھەر سەرچاوەيەكى<br>تر كە پىويست بوو؟) (33) | 7,5 |
| 7.6.               | How feasible is integrating step-by-step psychotherapy into primary health centers? (35)                                                                                                                                                     | 0                               | 1                      | 2                                             | 3            | 9                     | تا چەندىك ناوئىتەكردنى<br>(دمج) چارەسەرى دەرونى<br>ھەنگاۋ بەھەنگاۋ لە بئىكە<br>تەندروستىيەكاندا شتىكى<br>عەمەليە؟ (35)                                                                                                                           | 7,6 |
| 7.7.               | To what extent is staff turnover a problem here at this clinic? (36) (feas; POS)                                                                                                                                                             | 0                               | 1                      | 2                                             | 3            | 9                     | تا چ رادەيەك جىگۆركى و<br>وازەينانى كارمەند لەم بئىكە<br>تەندروستىيەدا گرتتە (36)                                                                                                                                                                | 7,7 |
| 7.8.               | To what extent is the staff at this clinic paid on time consistently? (38) (feas; POS)                                                                                                                                                       | 0                               | 1                      | 2                                             | 3            | 9                     | تا چ رادەيەك كارمەندانى ئەم<br>بئىكە تەندروستىيە لە كاتى<br>دىارىكراۋدا مۇچە وەردەگرن؟<br>(38)                                                                                                                                                   | 7,8 |



8. Penetration

8- بلاويونووه

| Question<br>پرسیار                                                                                | Not at all<br>به هیچ<br>شیوویهك | A little bit<br>كهميك | A moderate amount<br>تا رادیهك-مام<br>ناوهند | A lot<br>زور        | Do not know<br>نازانم      | Question<br>پرسیار                                                                                                          |
|---------------------------------------------------------------------------------------------------|---------------------------------|-----------------------|----------------------------------------------|---------------------|----------------------------|-----------------------------------------------------------------------------------------------------------------------------|
| 8.1. How accessible is step-by-step psychotherapy for most people in the community?(55)           | 0                               | 1                     | 2                                            | 3                   | 9                          | 8,1 تا چەندیك چارهسەری دەرونی هەنگاو بە هەنگاو دەگاتە زۆربەى خەلك له كۆمه‌لگادا؟ (55)                                       |
| 8.2. How accessible is step-by-step psychotherapy for the poorest people in the community? (56)   | 0                               | 1                     | 2                                            | 3                   | 9                          | 8,2 تا چەندیك چارهسەری دەرونی هەنگاو بە هەنگاو دەگاتە هەژارتەين خەلك له كۆمه‌لگادا؟ (56)                                    |
| 8.3. How accessible is step-by-step psychotherapy for women who need mental health services? (57) | 0                               | 1                     | 2                                            | 3                   | 9                          | 8,3 تا چەندیك چارهسەری دەرونی هەنگاو بە هەنگاو دەگاتە ئەو ژنانەى پېۆیستیان بە خزمەتگوزارى تەندروستی دەرونی هەیه؟ (57)       |
| 8.4. How accessible is step-by-step psychotherapy for men who need mental health services? (58)   | 0                               | 1                     | 2                                            | 3                   | 9                          | 8,4 تا چەندیك چارهسەری دەرونی هەنگاو بە هەنگاو دەگاتە ئەو ئەو پیاوانەى پېۆیستیان بە خزمەتگوزارى تەندروستی دەرونی هەیه؟ (58) |
| 8.5. Are there are groups in the community who cannot access step-by-step psychotherapy? (60)     | 0<br>No<br>نەخیر                |                       | 1<br>Yes<br>بەئى                             |                     | 9<br>Do not Know<br>نازانم | 8,5 ئایا له كۆمه‌لگاكەدا هیچ گروپىك هەن كه دەستیان بە چارهسەری دەرونی هەنگاو بە هەنگاو ناگات؟ (60)                          |
| 8.5a. If respondent answers yes, ask: Who are these groups?                                       |                                 |                       |                                              |                     |                            | 5,a8 ئەگەر وەلامدەر بە (بەئى) وەلامى داىه‌وه، لىى پېرسە: ئەو گروپانە كىن؟                                                   |
| 8.6. How much of the clinic's population lives within 1 hour travel time of the clinic? (34)      | 0<br>Almost none                | 1<br>Less than Half   | 2<br>Half                                    | 3<br>More than Half | 4<br>Almost All            | 8,6 چەندیكى ئەو نەخۆشانەى سەردانى بنكه تەندروستیەكە دەكەن سەعاتىك لیوهدى دورن؟ (34)                                         |

9. Positive Organizational Structure

9- لایه نه ئیجابیه کانی پیکهاتهی ریکخراو

|      | Question<br>پرسیار                                                                                           | Not at all<br>به هیچ<br>شیویهک | A little bit<br>که مێک | A moderate amount<br>تا رادهیهک- مام<br>ناوهند | A lot<br>زۆر | Do not know<br>نازانم | Question<br>پرسیار                                                                                                              |     |
|------|--------------------------------------------------------------------------------------------------------------|--------------------------------|------------------------|------------------------------------------------|--------------|-----------------------|---------------------------------------------------------------------------------------------------------------------------------|-----|
| 9.1. | How overworked do you feel in your job? (42)                                                                 | 0                              | 1                      | 2                                              | 3            | 9                     | تا چهندیك ههست دهكهیت ئهركی سهershانت قورسه؟ (42)                                                                               | 9,1 |
| 9.2. | To what extent is your boss a good leader? (2)                                                               | 0                              | 1                      | 2                                              | 3            | 9                     | تا چ رادهیهك لێپرسراوهكهت سهركردهیهکی باشه؟ (2)                                                                                 | 9,2 |
| 9.3. | When you have a problem at work, to what extent do you know who to go to for the answer? (43)                | 0                              | 1                      | 2                                              | 3            | 9                     | كاتێك لهكارهكهتدا گرفتێك دهپیت، تا چ رادهیهك دهزانیت كی بۆت چارهسهر دهكات؟ (43)                                                 | 9,3 |
| 9.4. | When you have a problem, to what extent is your (boss/supervisor) responsive and has an answer for you? (44) | 0                              | 1                      | 2                                              | 3            | 9                     | كاتێك كه گرفتێك ههپیت، تا چ رادهیهك ئهوه كهسهی دهچیت بۆ لای له بنكه تهندروستیهكه، بهدهمهتهوه دیت؟ (44)                          | 9,4 |
| 9.5. | How well informed do you feel on things you should know about within the clinic where you work? (45)         | 0                              | 1                      | 2                                              | 3            | 9                     | لهناو ئهوه بنكه تهندروستیهی کاری تیدا دهكهیت، تا چهندیك ههست دهكهیت زۆر بهباشی ئاگاداری ئهوه شتانهیت كه پێویسته بیانزانیت؟ (45) | 9,5 |
| 9.6. | How positive is your working environment? (13)                                                               | 0                              | 1                      | 2                                              | 3            | 9                     | تا چهندیك ژینگهی کارکردنهكهت ئیجابیه؟ (13)                                                                                      | 9,6 |
| 9.7. | To what extent are there enough learning opportunities offered to you through your clinic? (14)              | 0                              | 1                      | 2                                              | 3            | 9                     | تا چ رادهیهك بنكه تهندروستیهكه دهرفهتی باشت بۆ دهرهخسینیت بۆ فێرکردنی شتی نوێ؟ (14)                                             | 9,7 |

|       | Question<br>پرسیار                                                                                          | Not at all<br>به هیچ<br>شئوہیہك | A little bit<br>كہميك | A moderate amount<br>تا رادہیہك-مام<br>ناوہند | A lot<br>زۆر | Do not know<br>نازانم | Question<br>پرسیار                                                                                                                 |      |
|-------|-------------------------------------------------------------------------------------------------------------|---------------------------------|-----------------------|-----------------------------------------------|--------------|-----------------------|------------------------------------------------------------------------------------------------------------------------------------|------|
| 9.8.  | To what extent is there a high level of cohesion within this clinic? (17)                                   | 0                               | 1                     | 2                                             | 3            | 9                     | تا چ رادہیہك ئاستیكى<br>بہرزى ھەماھەنگى لەناو<br>ئەم بنكە تەندروستیەدا<br>ھەیە؟ (17)                                               | 9,8  |
| 9.9.  | To what extent is the communication within this clinic positive and useful (i.e. It is working well.)? (18) | 0                               | 1                     | 2                                             | 3            | 9                     | تا چ رادہیہك لەناو ئەم<br>بنكە تەندروستیەكەدا،<br>پەیوہندییەكى ئیجابى و<br>بەسود ھەیە(واتە باشى<br>ھەیە) (18)                      | 9,9  |
| 9.10. | To what extent does the clinic where you work promote your professional growth? (20)                        | 0                               | 1                     | 2                                             | 3            | 9                     | تا چ رادہیہك ئەو بنكە<br>تەندروستیەى كاری تیدا<br>دەكەیت پەرە بە<br>گەشەکردنى پیشەییەت<br>دەدات؟ (20)                              | 9,10 |
| 9.11. | How adaptable is the clinic to solving problems you face in your work? (30)                                 | 0                               | 1                     | 2                                             | 3            | 9                     | تا چەندىك ئەو بنكە<br>تەندروستیەى كاری تیدا<br>دەكەیت گونجاوہ بۆ<br>چارەسەرى ئەو كێشانەى<br>رۆبەرۆوت دەبنەوہ لە<br>كارەكەتدا؟ (30) | 9,11 |
| 9.12. | How frustrated are you with the current situation within the clinic where you work? (12)                    | 0                               | 1                     | 2                                             | 3            | 9                     | تا چەندىك ناوئەمیدیت لە<br>باودۆخى ئیستای بنكە<br>تەندروستیەكە؟ (12)                                                               | 9,12 |
| 9.13. | To what extent do staff at this clinic have a high amount of morale? (37)                                   | 0                               | 1                     | 2                                             | 3            | 9                     | تا چ رادہیہك كارمەندانى<br>ئەم بنكە تەندروستیە<br>ورەیان بەرزە؟ (37)                                                               | 9,13 |
| 9.14. | How much do you care about the direction and success of this clinic? (41)                                   | 0                               | 1                     | 2                                             | 3            | 9                     | تا چەندىك سەرکەوتنى<br>ئەم بنكە تەندروستیەت<br>بەلاوہ گرنگە؟ (41)                                                                  | 9,14 |

**10. Sustainability**

**10-بەردەوامى**

| Question<br>پرسىيار |                                                                                                                         | No<br>نەخپىر | Yes<br>بەئى | Maybe<br>لەوانەيە | No Idea<br>نازانم | Question<br>پرسىيار                                                                                        |        |
|---------------------|-------------------------------------------------------------------------------------------------------------------------|--------------|-------------|-------------------|-------------------|------------------------------------------------------------------------------------------------------------|--------|
| 10.1.               | Do you think the step-by-step psychotherapy program will continue after international aid and expert support ends? (48) | 1            | 2           | 3                 | 4                 | پىت وايە دوای تەواو بونى پالپشت و شارەزايى دەرهكى پرۇگرامى چارەسەرى دەرونى ھەنگاۋ بەھەنگاۋ بەردەوام دەپىت؟ | 10،1   |
| 10.1 a.             | If respondent answers NO or MAYBE ask: What do you see as the barriers to sustainability (48a)                          |              |             |                   |                   | ئەگەر وەلامەكە نەخپىر يان (رەنگە) بوو، پىرسە: بەلای تۆۋە رېنگەكان چىن؟ (48a)                               | 10،1 a |

**11. Willingness to change**

**11 - خواستى گۇران**

| Question<br>پرسىيار |                                                                                             | Not at all<br>بە ھىچ شىۋەيەك | A little bit<br>كەمىك | A moderate amount<br>تا رادەيەك-مام ناۋەند | A lot<br>زۇر | Do not know<br>نازانم | Question<br>پرسىيار                                                                    |      |
|---------------------|---------------------------------------------------------------------------------------------|------------------------------|-----------------------|--------------------------------------------|--------------|-----------------------|----------------------------------------------------------------------------------------|------|
| 11.1.               | How much would you like to try something new to address the problems in this community? (9) | 0                            | 1                     | 2                                          | 3            | 9                     | تا چەندىك پىت خۆشە شتىكى نوئ بۇ چارەسەرى گىرەتەكانى ناۋ كۆمەلگاكە تاقىيەكەپتەۋە؟ (9)   | 11،1 |
| 11.2.               | How willing are you to try something new if the clinic will get some benefit from it? (10)  | 0                            | 1                     | 2                                          | 3            | 9                     | تا چەندىك پىت خۆشە ھەۋلى شتىكى نوئ بەدەيت بۇ سود گەياندىن بە بىنكە تەندروسىتەكەت؟ (10) | 11،2 |
| 11.3.               | To what extent are you a person who is generally open to change? (11)                       | 0                            | 1                     | 2                                          | 3            | 9                     | بەگشتى تا چ رادەيەك تۆ كراۋەيت بۇ گۇران؟ (21)                                          | 11،3 |

|       | Question<br>پرسیار                                                           | Specify<br>دیاری بکه | Question<br>پرسیار                                                                             |      |
|-------|------------------------------------------------------------------------------|----------------------|------------------------------------------------------------------------------------------------|------|
| 12.1. | What are the criteria for selecting mental health staff at this clinic? (21) |                      | مهرجه گانی هه لېزاردنی<br>کارمه ندی تهن دروستی دهرونی<br>له م بنگه تهن دروستیه دا چین؟<br>(21) | 12,1 |

**Instructions to interviewer:****رېنمایي بۆ دیمانەساز:**

Thank the person for their time

سوپاسی کهسه که بکه بۆ نه و کاته ی بۆ تویی داناه
