# Supplementary material for: Stakeholder perspectives on integration of mental health services into primary care: a mixed methods study in Northern Iraq
Source: PubMed Central journal article supplement (PMC6935235; doi:10.1186/s13033-019-0330-7), 2019-12-28
Supplement: 13033_2019_330_MOESM2_ESM.pdf [file 13033_2019_330_MOESM2_ESM.pdf]

## Qualitative Interview Guide – Providers

### رېبەرى دېمانەى جۆرى – چارەسازى دەروونى

#### Instructions to interviewer:

#### رېنماىى بۇ دېمانەساز

1. Greet person. 1. سلارو كردن.
2. Introduce yourself and explain the study using the consent form. 2. خۆت بناسىنە و تويژىنەوەكە روون بکەوہ به به کارهينانى فۆرمى رەزامەندى.
3. If person consents and agrees to interview, find a private location (if not already in one). 3. ئەگەر كەسەكە رەزامەندى دەربرىودېمانەكەى قبول كړد، شوينىكى گونجاو بدزەوہ بۇ ئەوہى دېمانەكەى تيا سازبکەى.
4. Fill in information at top of notes about:
  - Date
  - Interviewer ID number
  - Respondent ID number,
  - Whether this is interview 1 (baseline), or 2 (follow-up).4. ئەم زانباريانەى خوارەوہ لەسەرەوہى فۆرمى وەلامەكان تۆمار بکە:
  - بەروار
  - كۆدى دېمانەساز
  - كۆدى وەلامدەرئايا ئەمە كامە دېمانەىه: يەكەم (لە سەرەتاي تويژىنەوہ) يان دووہم (لە كۆتايى)
  -
5. Ask the respondent the qualitative interview questions. One interviewer asks the questions while the other interviewer records the responses on the qualitative interview notes. Probe until the interviewee says they cannot think of any more to say. Then probe using the specified probes in the qualitative interview to get more specific information. 5. پرسىارى جۆرى لە كەسەكە بکە. دېمانەكە لەلايەن دوو كەس ئەنجام دەدرىت: يەككىيان پرسىارى دەكات و دووہم كەسىش وەلامەكان تۆماردەكات. هەتا دەكرىت چارەسازەكە به قسە بهينە تازۆرتريين زانباريت دەست بکەوئت دەربارەى هەر پرسىارىك. ئەمانەى خوارەوہ پرسىارەكانن:

#### Question

#### پرسىارى

- 5.1. Tell me about the current situation regarding mental health and mental health care in your community. What are the good things, the challenges or problems, what needs to change about mental health options? Be sure to probe on the following: 5.1. دەتوانىت پيمان بلانیت تەندروستى دەروونى و خزمەتگوزارى تەندروستى دەروونى لەم ناوچەىهى تۆى لىيت لە ئىستادا چۆنە؟ لایەنە باش و رېگريهەكانى چين و بېويستە چى بگۆردرىت دەربارەى ئەو خزمەتگوزارىه تەندروستىه

- Good things?
  - Challenges or problems?
  - What needs to change about mental health options?
- دەرونیە؟
- بە قسەى بەینە دەربارەى:
- شتە باشەکان
  - رینگریبەکان و گرافتەکان
  - پئویستە جى بگۆردریت دەربارەى ئەو
- خزمەتگوزاریبە تەندەرستیبە دەرونیە؟
- 5.2. Tell us about any perceptions you believe exist among providers at your clinic about the mental health services offered at your clinic? (Probe on non-drug mental health services)
- .5,2
- کارمەندەکانى تر رايان چۆنە دەربارەى ئەو
- خزمەتگوزاریبە تەندەرستیبە دەرونیەى لەم بنکە
- تەندەرستیبە پيشکەش دەکریت؟ (بەقسەى بەینە
- دەربارەى خزمەتگوزارى تەندەرستی دەرونى بى دەرمان)
- 5.3. Tell us about the working situation at your clinic. When I say *working situation* I mean things such as relationships, supervision, physical space, etc. What are the good things, the challenges or problems, what needs to change about the working situation? Be sure to probe on the following:
- Good things?
  - Challenges or problems?
  - What needs to change about the working situation?
- .5,3
- دەتوانیت باسى بارودۆخى کارکردن لەم بنکەبەمان بۆ
- بکەیت؟ مەبەستمان لە بارودۆخى کارکردن ئەوویە بۆ
- نەمۆنە، پەيوەندى کارمەندەکان لەگەل یەکترى،
- سەرپەرشتیکردن، بونی جیگا، هتد. لایەنە باش و
- رینگریبەکانى چین و پئویستە جى بگۆردریت دەربارەى ئەو
- خزمەتگوزاریبە تەندەرستیبە دەرونیە؟
- بە قسەى بەینە دەربارەى:
- شتە باشەکان
  - رینگریبەکان و گرافتەکان
  - پئویستە جى بگۆردریت دەربارەى ئەو
- خزمەتگوزاریبە تەندەرستیبە دەرونیە؟
- 5.4. I'd like to have you tell me about your experiences with step-by-step psychotherapies. What are the positive things, the gaps or challenges, what needs to be changed about step-by-step psychotherapy? Be sure to probe on the following:
- Positive things?
  - Gaps or challenges that still need to be resolved?
  - What needs to change about step-by-step psychotherapy?
- .5,4
- پیمان خۆشە باسى ئەزموونى خۆتمان بۆ بکەیت
- دەربارەى چارەسەرى دەروونى هەنگاوبە-هەنگاو. چ
- شتیکى بەلاتەو بە باش بوو، چ شتیکى بەلاتەو بە باش نەبوو،
- هەرودها پیت باشە چ گۆرانکاریەك لەو چارەسەرەدا
- بکریت؟
- بە قسەى بەینە دەربارەى:
- شتە باشەکان
  - رینگریبەکان و گرافتەکان
  - پئویستە جى بگۆردریت دەربارەى ئەو

خزمه تگوزار ييه تهندرست ييه دهر ونيه؟

- 5.5. Now I would like to ask you some different questions about step-by-step psychotherapy. 5,5
- ئىستا دهمه وىت پرسىار دهر باره ي چهن د لايه نيكى ئەم چاره سهرى ههنگاو به ههنگاو ت لى بكم.
- 5.5.1 Tell me specifically about the feasibility of step-by-step psychotherapy. When I say *feasibility* I mean whether step-by-step psychotherapy can be carried out with the available resources. These resources include appropriately trained personnel, money, time, buildings and furniture, technology, communication. 5,5,1
- (Probe on:
- What makes it more feasible?
  - What makes it less feasible?
  - What needs to change to make it more feasible?)
- دهتوانيت بهر پزتان باسى ئەو دمان بۆ بكهيت ئايا ئەم چاره سهرى دهر ونى ههنگاو به ههنگاو تا چ راده يه كه عه مه ليه؟ مه به ستم ئەو ديه كه ئايا دهكرىت ئەم بهرنامه يه به ئيمكاناتى ئىستا پياده بكرىت؟ ئەم ئيمكاناتانه برىتين له: كارمهندي مه شق پيكر او به شيوه يه كى گونجاو، پاره، كات، بينايه، كه لوپهل وهك ميژ و كورسى هتد... و هۆيه كانى په يوه نديكر دن.
- به قسه ي بهينه دهر بارى:
- چى وا ئەكات زياتر عه مه لى بييت؟
  - چى وا ئەكات كه متر عه مه لى بييت؟
  - پيويسته چى بگۆردرىت بۆ ئەوه ي زياتر عه مه لى بييت؟
- 5.5.2 Tell me specifically about the acceptability of step-by-step psychotherapy. When I say *acceptability* I am talking about the perception that step-by-step psychotherapy is agreeable, palatable, and/or satisfactory. 5,5,2
- (Probe on:
- what makes it more acceptable?
  - What makes it less acceptable?
  - What needs to change to make it more acceptable?)
- ب. دهتوانيت بهر پزتان باسى ئەو دمان بۆ بكهيت ئايا ئەم بهرنامه يه تا چ راده يه كه مهقبووله؟ مه به ستم ئەو ديه كه ئايا ئەم چاره سهرى دهر ونى ههنگاو به ههنگاو تا چ راده يه كه قبوول دهكرىت. )
- به قسه ي بهينه دهر بارى:
- چى وا ئەكات زياتر مهقبول بييت؟
  - چى وا ئەكات كه متر مهقبول بييت؟
  - پيويسته چى بگۆردرىت بۆ ئەوه ي زياتر مهقبول بييت؟
- 5.5.3 Tell me specifically about the sustainability of step-by-step psychotherapy. When I say *sustainability* I am talking about the extent to which you think step-by-step psychotherapy will continue after international funding and support 5,5,3
- باسى بهردهوام بوونى چاره سهرى دهر ونى ههنگاو به ههنگاو بۆ بكه. مه به ستم ئەو ديه ئەگه رى بهردهوام بوونى ئەم چاره سهرى ههنگاو به ههنگاو

from international experts is terminated.

(Probe on:

- What makes it more sustainable? What makes it less sustainable?
- What needs to change to make it more sustainable?)

چۈنە ئەگەر ھاۋكارى نىۋنەتەۋەدى نەمىنىت؟

بەقسەى بەينە دەربارى:

• چى وا ئەكات زياتر بەردەوام بىت؟

• چى وا ئەكات كەمتر بەردەوام بىت؟

• پىۋىستە چى بگۆردىت بۇ ئەۋەى

زياتر بەردەوام بىت؟

5.5.4 Tell me specifically about the appropriateness of step-by-step psychotherapy. When I say *appropriateness* I am talking about your perceptions on whether step-by-step psychotherapy is a good way to address the mental health problems of your clients.

(Probe on:

- What makes it more appropriate?
- What makes it less appropriate?
- What needs to change to make it more appropriate?)

د. دەتوانىت بەرپزتان باسى گونجاۋى ئەم چارەسەرى  
ھەنگاۋ بە ھەنگاۋە بکەيت؟ مەبەستم ئەۋەى بەرپاى  
ئىۋە ئايا ئەم چارەسەره باشە بۇ چارەسەركردنى  
گرفتى نەخۇشەكانت؟

بەقسەى بەينە دەربارى:

• چى وا ئەكات زياتر گونجاۋ بىت؟

• چى وا ئەكات كەمتر گونجاۋ بىت؟

• پىۋىستە چى بگۆردىت بۇ ئەۋەى

زياتر گونجاۋ بىت؟

5,5,4

5.6. Tell us about any perceptions you believe exist among your colleagues about step-by-step psychotherapy?

ھاۋكارەكانت رايان چىە دەربارەى چارەسەرى دەرونى  
ھەنگاۋ بە ھەنگاۋ؟

5,6

5.7. Tell us how you came to be recruited to provide step-by-step psychotherapy (Probe on:

- How were you chosen?
- What were you told?
- By whom?
- Your thoughts on the recruitment process?)

چۈن بەرپزتان دەستنىشان کران بۇ بەشدارى کردن لە  
خولى رايانى چارەسەرى دەرونى ھەنگاۋ بە ھەنگاۋ؟  
(بەقسەى بەينە دەربارەى: چۈن ھەلپزدرایت؟ چيان  
پى گوتیت؟ لەلایەن كىۋە؟ رات چىە دەربارەى پرۆسەى  
دەستنىشان کردنەكە؟)

5,7

5.8. What are the challenges to implementing step-by-step psychotherapy? What are the things that make it easier to implement step-by-step psychotherapy?

ئەۋ بەرپەستانە چين كە رپگرن لەبەردەم جىبەجى  
کردنى چارەسەرى دەرونى ھەنگاۋ بە ھەنگاۋ ؟ ئەۋ  
ھۆكارانە چين كە جىبەجى کردنى ئاسانتر دەكەن؟

5,8

5.9 In this area, we're seeing difficulties in maintaining the program and how it will continue after outside support ends. What

ھەست دەكەين لەم ناۋچەيەدا قورسەك ھەيە لە

5,9

- are all the problems that in your opinion have affected the implementation of the program?
- مانه‌وهی به‌رنامه‌که و چۆنییتی به‌رده‌وام بوونی دواى  
ته‌واوبونی پالپشتی دهره‌کی. به بۆچونی تۆ چین ئه‌و  
کیشانه‌ی که کاریگه‌ریان هه‌بووه له‌سه‌ر جیبه‌جیکردنی  
به‌رنامه‌که؟
- 5.10 What are all the changes that need to be made to ensure that the program will continue here after outside supports end?
- 5,10 ئه‌و گۆرانکیانه چین که پیویسته بکړین بۆ ئه‌وه‌ی  
دنیابین که به‌رنامه‌که له‌م ناوچه‌یه‌دا به‌رده‌وام ده‌بیت  
دواى ته‌واوبونی پالپشتی دهره‌کی؟
- 5.11 Is there anything else you think is important to tell us about mental health services?  
(Probe on:  
• Barriers  
• Facilitators  
• Strong beliefs  
• Cultural considerations  
• Logistical issues)
- 5,11 به‌رای ئیوه هیچ خالیکی تر هه‌یه که گرنگ بیت  
دهرباره‌ی خزمه‌تگوزاری ته‌ندروستی دهره‌وونی؟  
(به‌قسه‌ی به‌ینه‌ی دهره‌باره‌ی: به‌ریه‌سته‌کان،  
ئاسانکاریه‌کان، هۆکاری که‌لتووری، بیروباوه‌ری توند،  
هۆکاری لۆجیستی)
- 5.12 Is there anything else you think is important about step-by-step psychotherapy in particular?
- 5,12 هیچ خالیکی تایبه‌ته‌یه که گرنگ بیت دهره‌باره‌ی  
چاره‌سه‌ری دهره‌وونی هه‌نگاو به‌هه‌نگاو و به‌تووت پیمان  
بانییت؟

**Instructions to interviewer:**

**رینمایى بۆ دیمانە‌ساز**

6. Both interviewers read through the notes with the interviewee still present. If anything is not clear ask for clarification and correct your notes as necessary.
6. هه‌ردوو دیمانە‌سازە که وه‌لامه‌کانب‌خویننه‌وه‌له‌وکاته‌ی که که‌سه‌که  
هیشتا لاتاندا نیشته‌وه .  
ئه‌گه‌ر هه‌ر خالیکی کۆر و نوتاشکرانه‌بوو، دوو باره‌پرسیاری لیبیکه‌نه‌وه‌وه‌لامه‌کانبه‌گۆیره‌ی پیوسته‌پاستبکه‌نه‌وه .
7. Ask if interviewee has anything to add. Add to the interview notes as needed.
7. بپرسه : وه‌کدا قسه ، هیچی تر تهاوه‌بیلییت؟  
(ئه‌گه‌ر هه‌بوو ته‌واتۆماری بکه‌ن).
8. Ask if you can return if necessary (record when and where you can return in your notes).
8. بپرسه : ئایاده‌توانیندوو باره‌دیمانە‌تله‌گه‌ن بکه‌یننه‌گه‌ر پیویست بوو؟  
(ئه‌گه‌ر رازی بوو، له‌سه‌ر پشتی‌فۆر میوه‌لامه‌کانکاتوشویننه‌که‌بنوسه‌ک)

هگونجا و بیټېره ردوولان). .

9. Thank person and leave.

9. سوپاسیبه و کوتایه دیمانہ که بهینه .
